# Supplementary material for: Intermittent Beginning to the Formation of Hydrogenous Ferromanganese Nodules in the Vast Field: Insights from Multi-Element Chemostratigraphy Using Microfocus X-ray Fluorescence
Source: MDPI journal article supplement (doi:10.3390/min11111246), 2021-11-10
Supplement: s1 [file s1]

## East EEZ

YK16-01 6K#1459N1-004

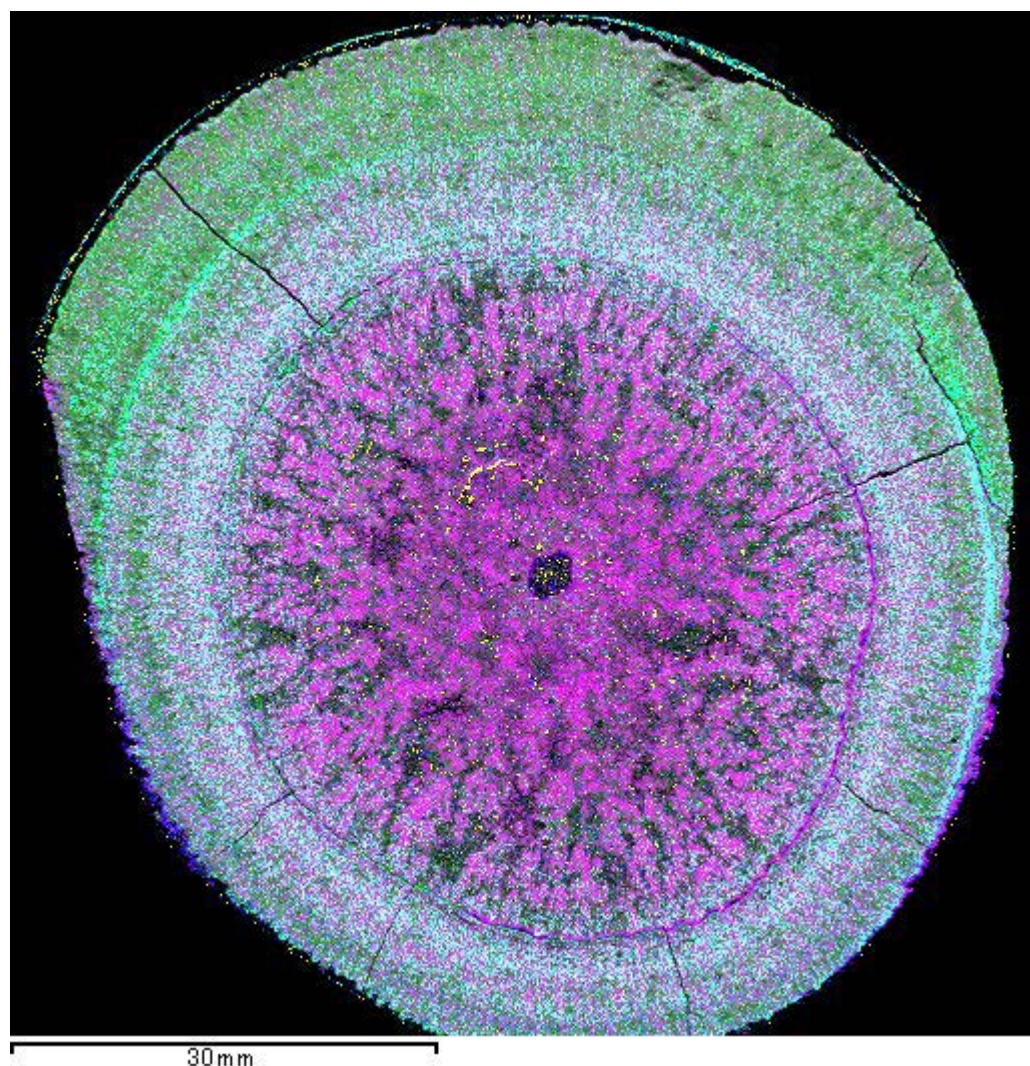

YK16-01 6K#1459N1-007

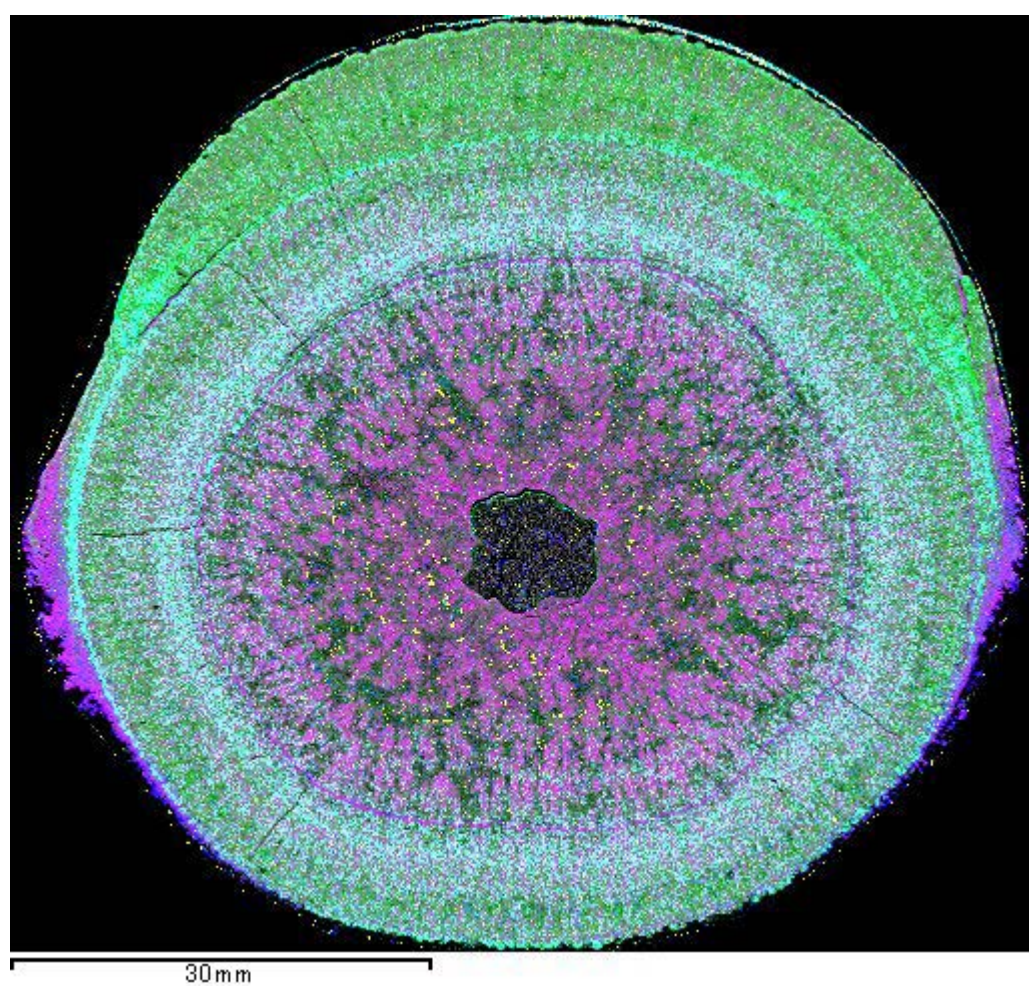

YK16-01 6K#1459N1-013a

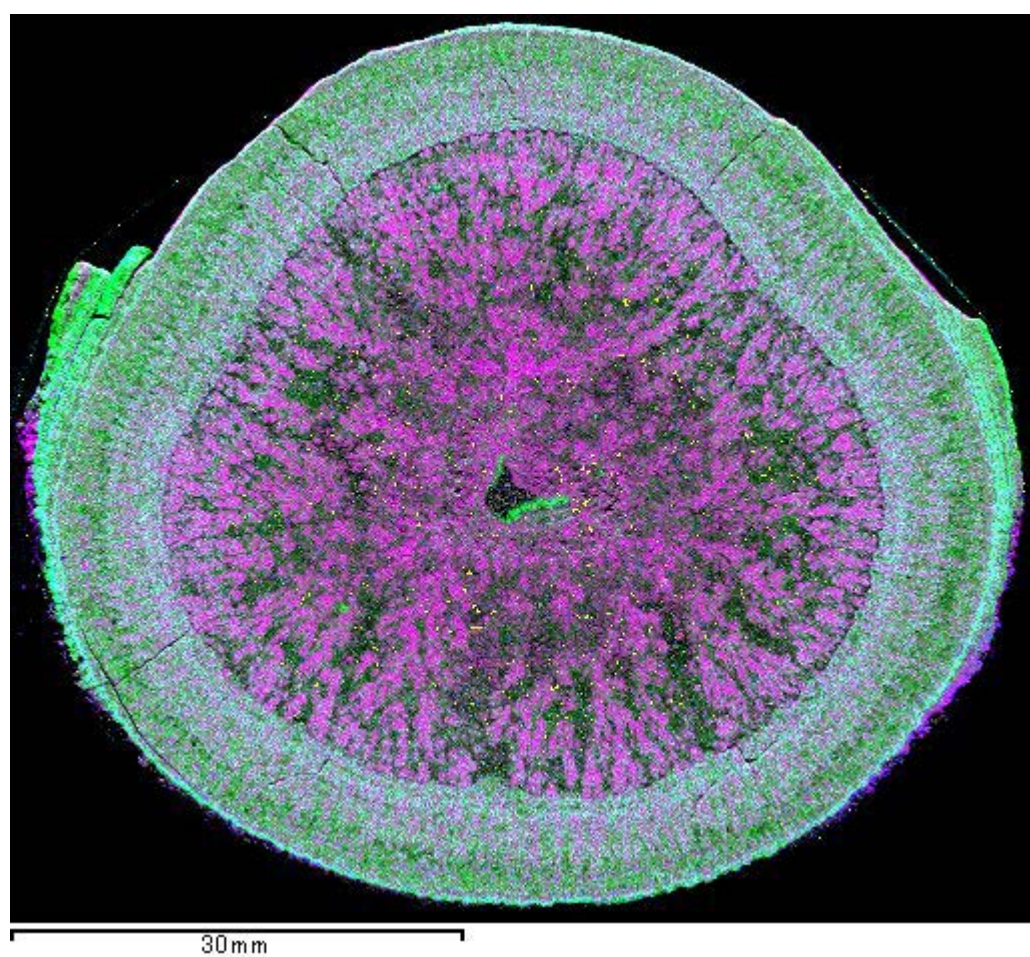

YK16-01 6K#1459N1-013b

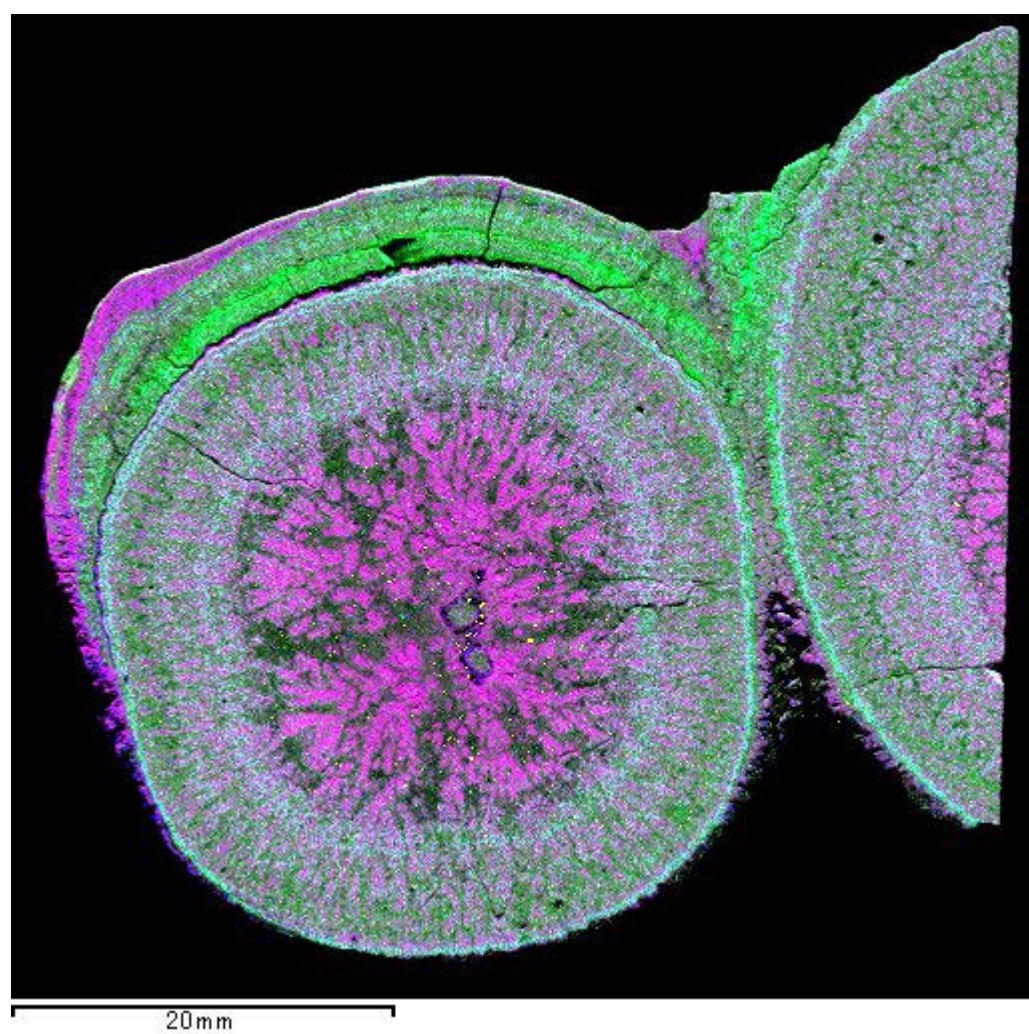

**Figure S1** Merged multichemical feature map of the samples analyzed in this study collected from site 6K#1459 in the East EEZ region during the cruise YK16-01. The gray field indicates the nucleus(nuclei) of each sample.



East EEZ

YK16-01 6K#1459N4-001

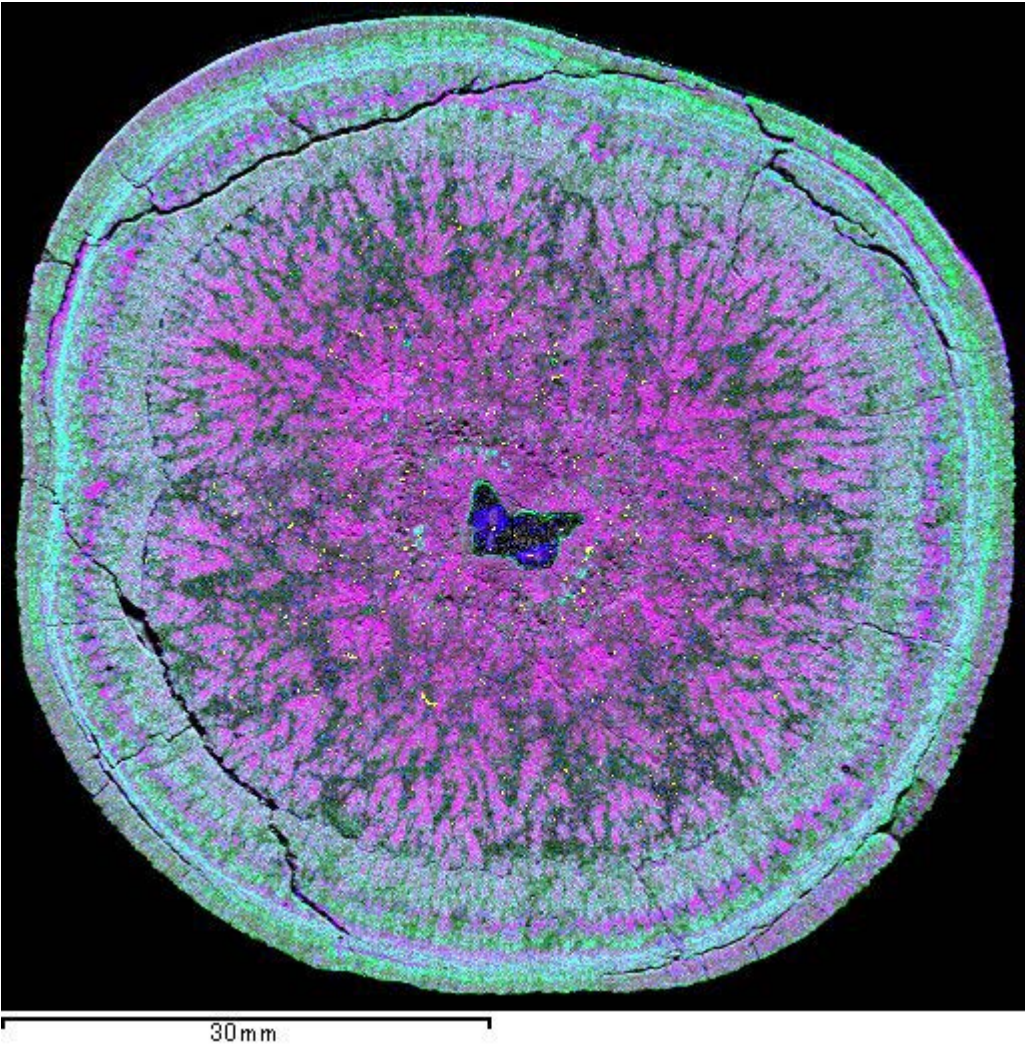

YK16-01 6K#1459N4-004a

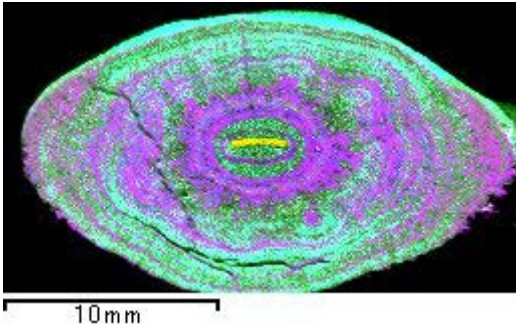

YK16-01 6K#1459N4-004b

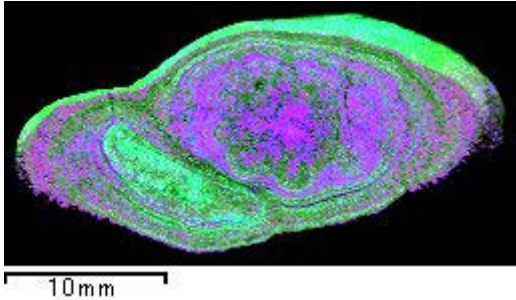

YK16-01 6K#1459N5-002

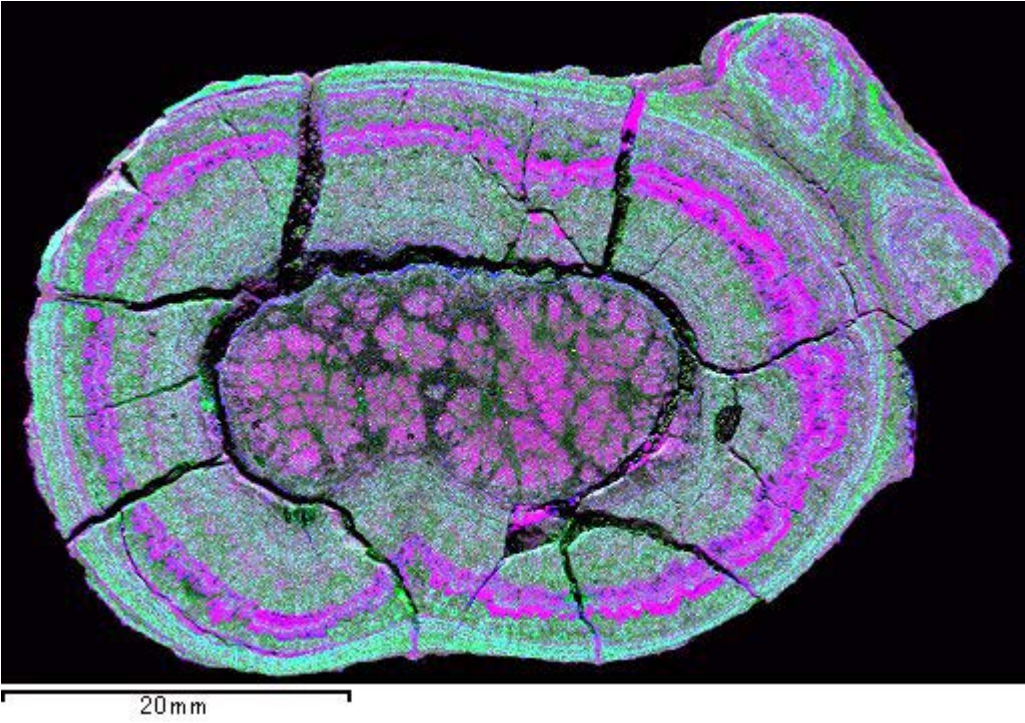

Figure S1 (Continued)



## Southeast EEZ

YK16-01 6K#1462N1-001A

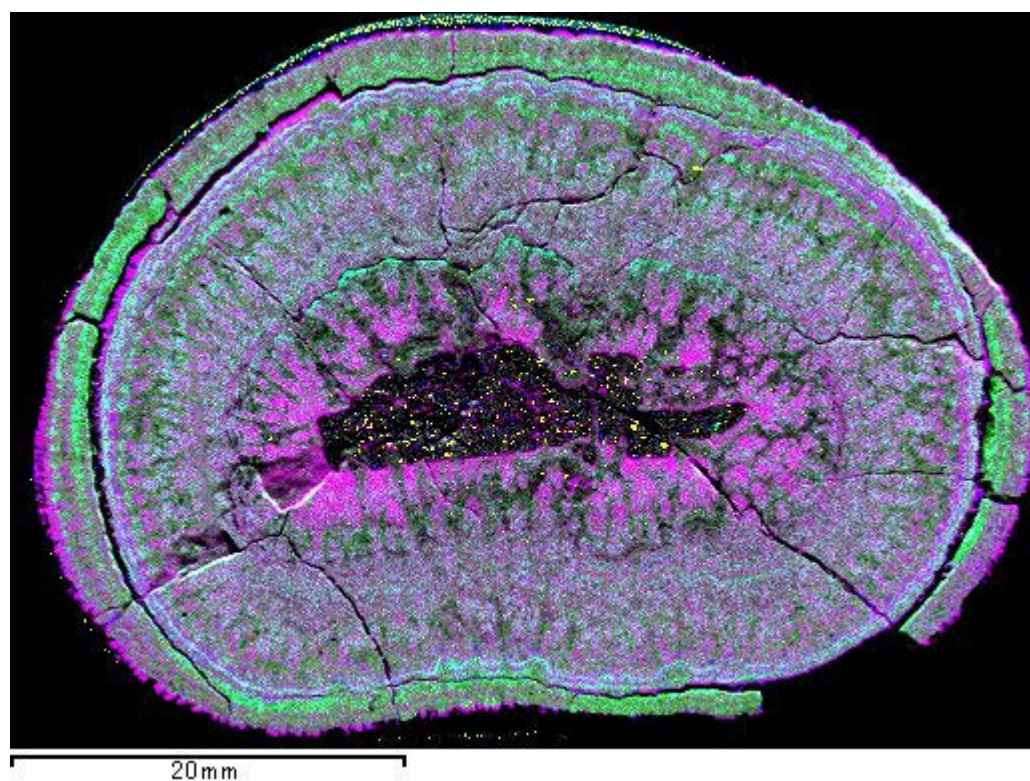

YK16-01 6K#1462N1-005

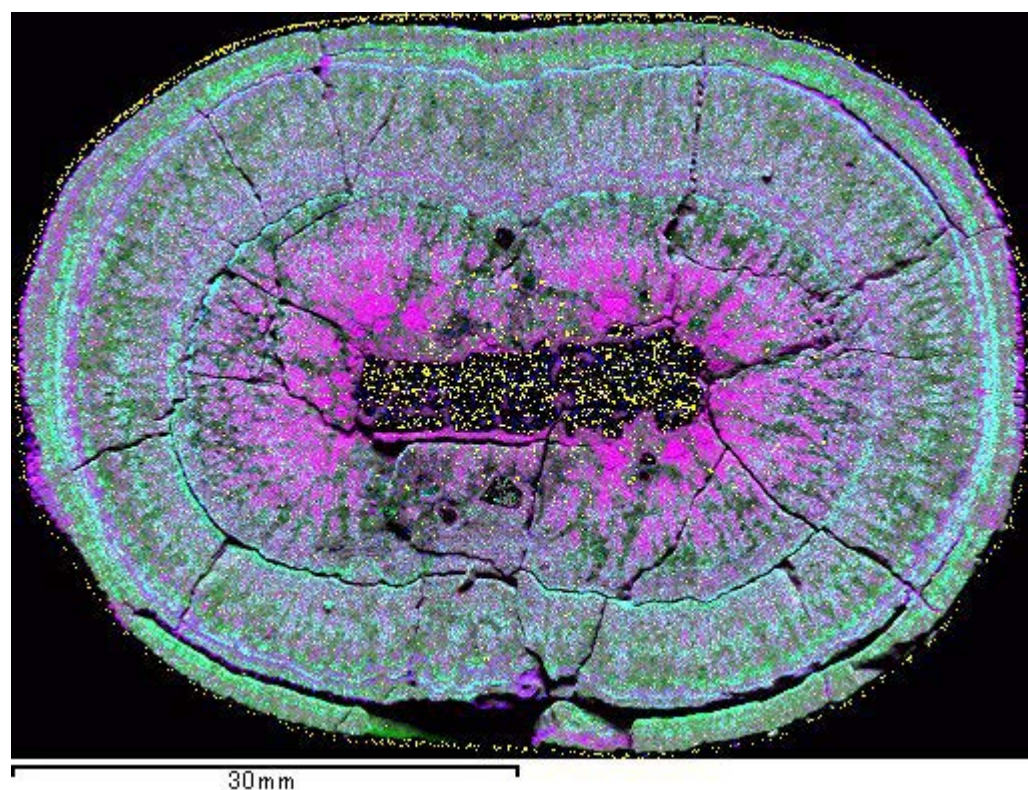

YK16-01 6K#1462N1-031

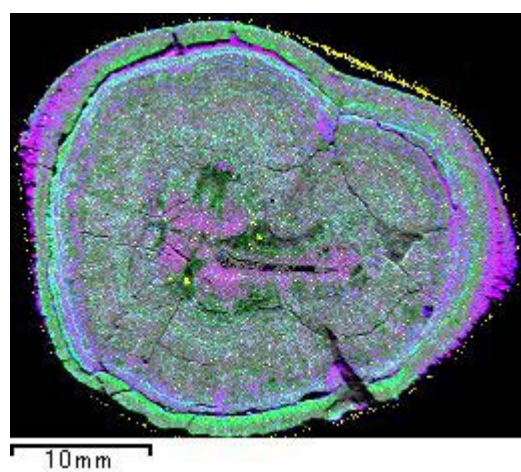

YK16-01 6K#1462N1-038

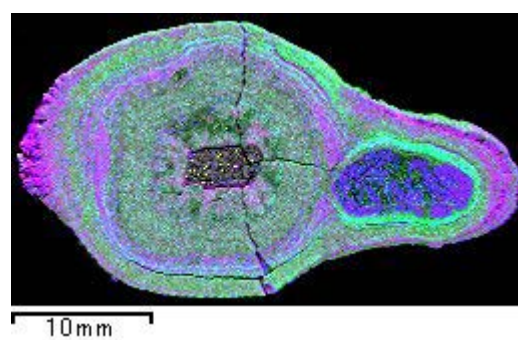

YK16-01 6K#1462N1-039

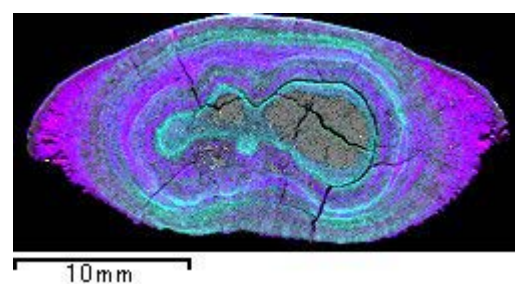

YK16-01 6K#1462N4-001B

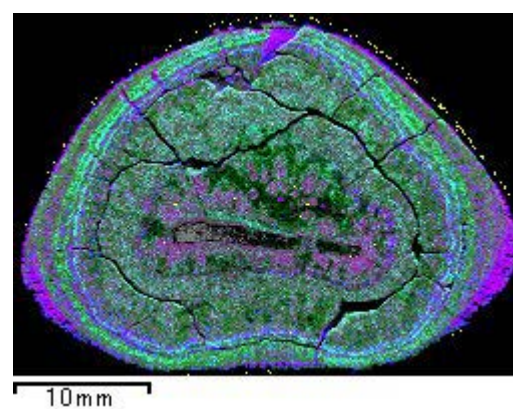

YK16-01 6K#1462N5-002

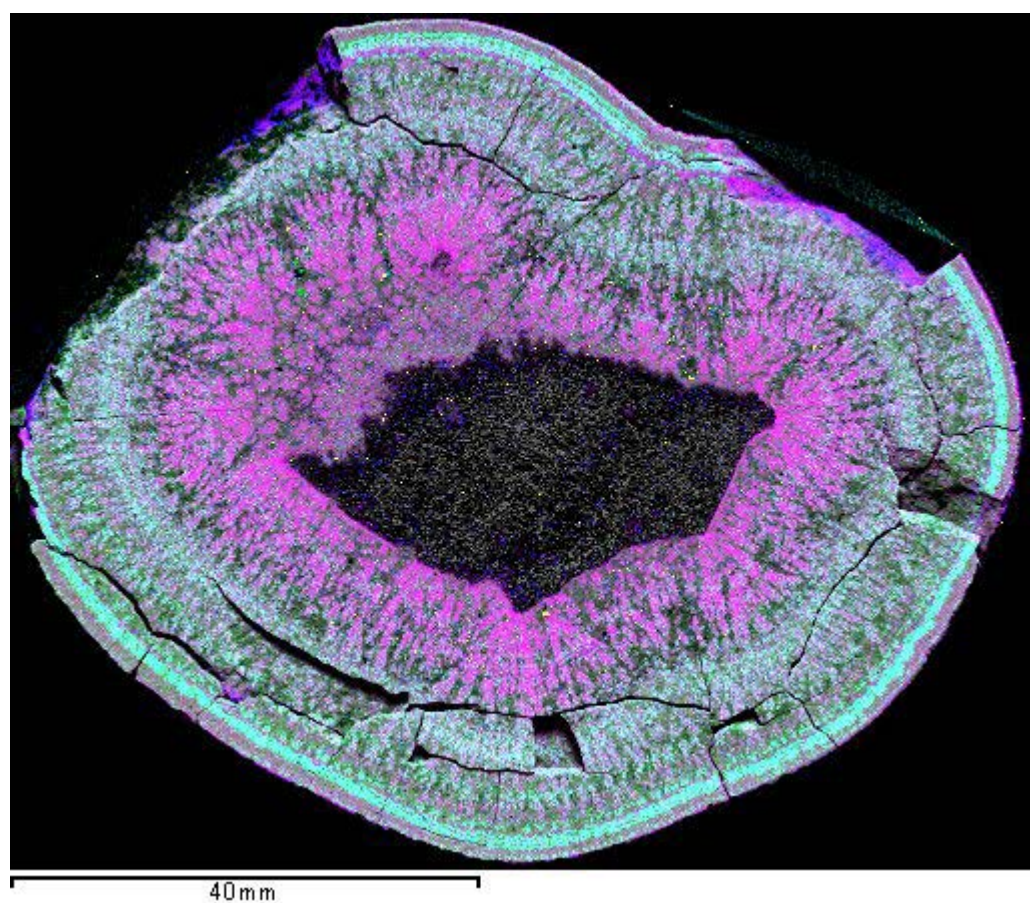

YK16-01 6K#1462N5-006

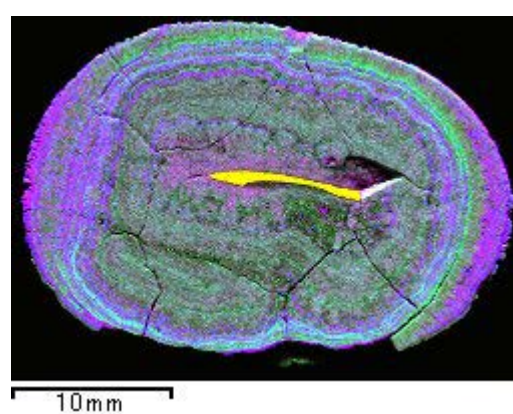

**Figure S2** Merged multichemical feature map of the samples analyzed in this study collected from site 6K#1462 in the Southeast EEZ region during the cruise YK16-01. The gray field indicates the nucleus(nuclei) of each sample.



# Southeast EEZ

YK16-01 6K#1463N1-010

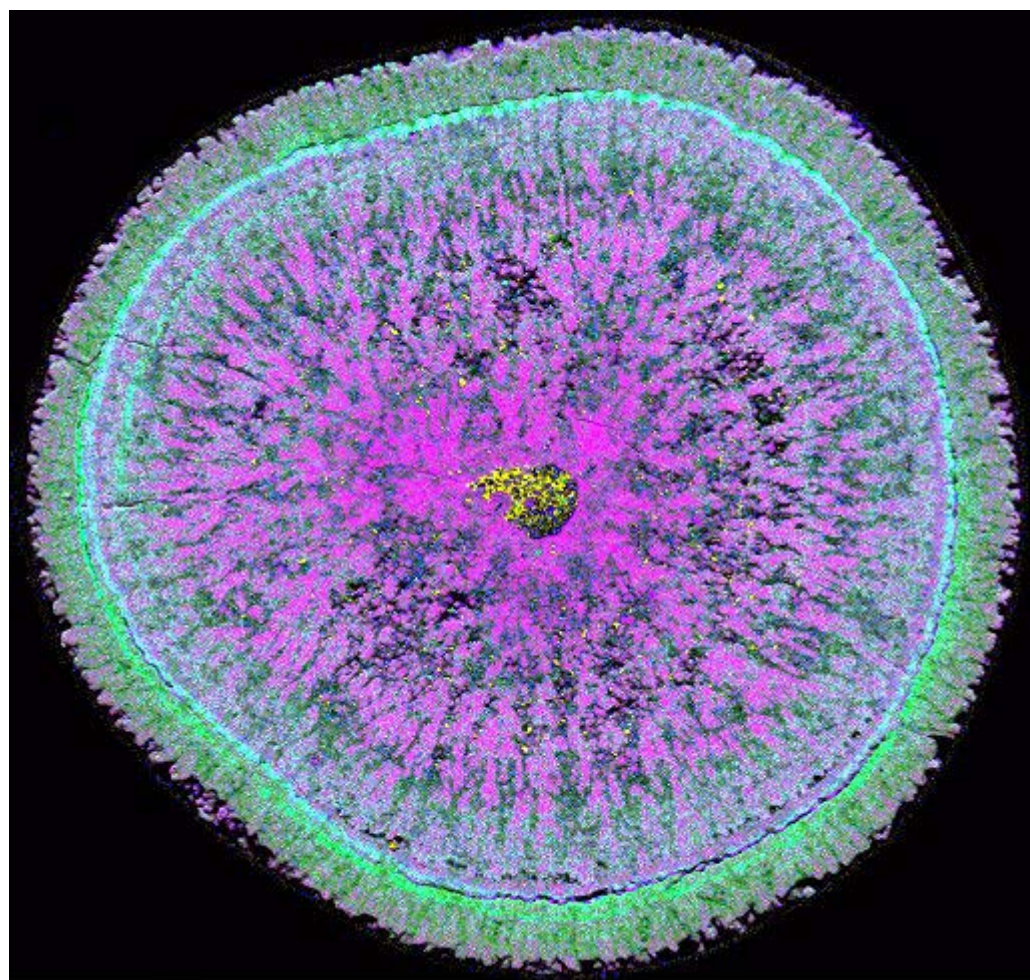

YK16-01 6K#1463N1-015

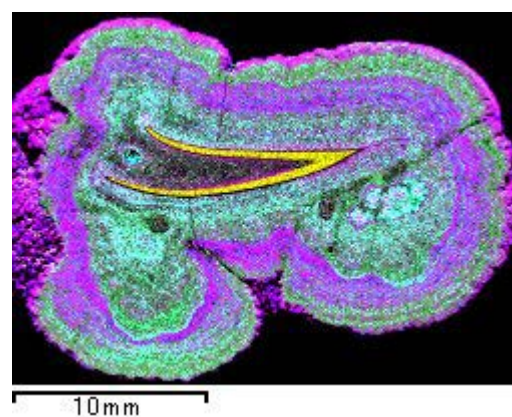

YK16-01 6K#1463N2-002

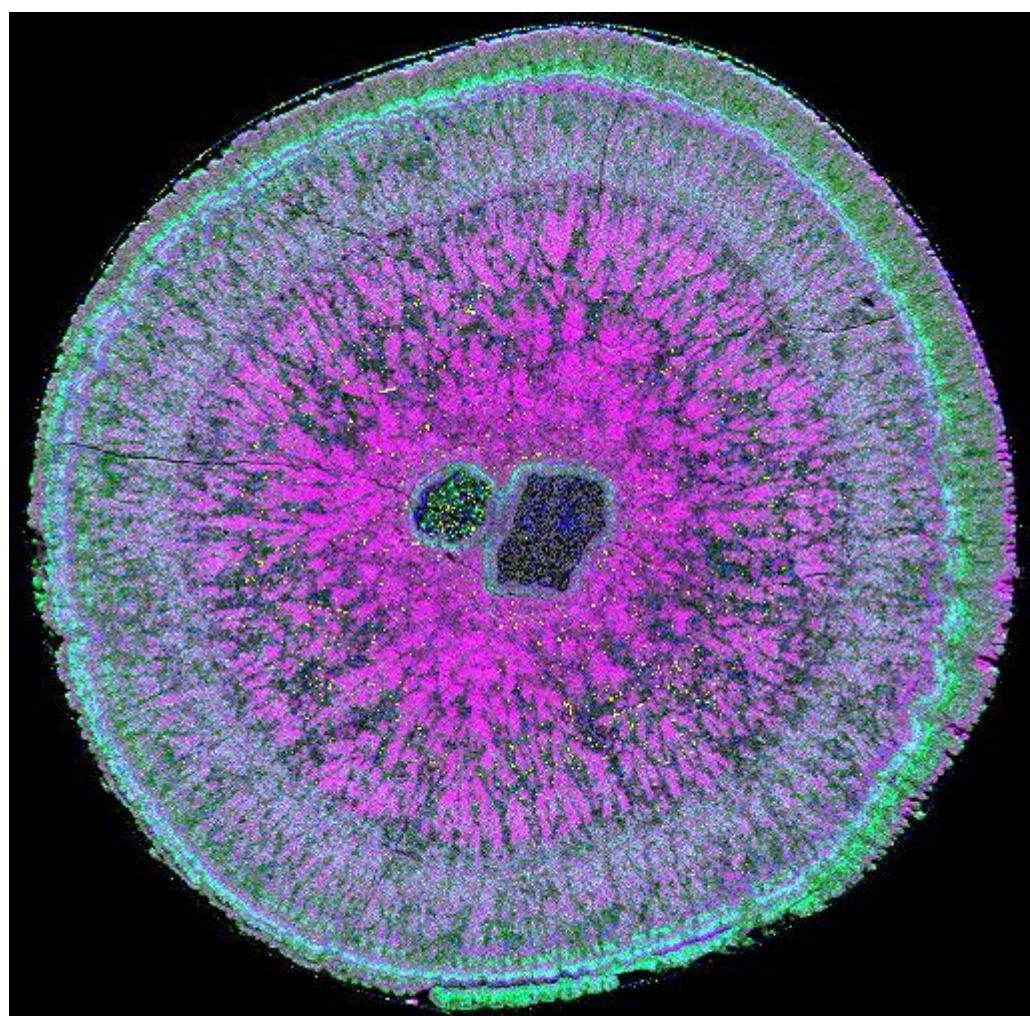

YK16-01 6K#1463N2-014

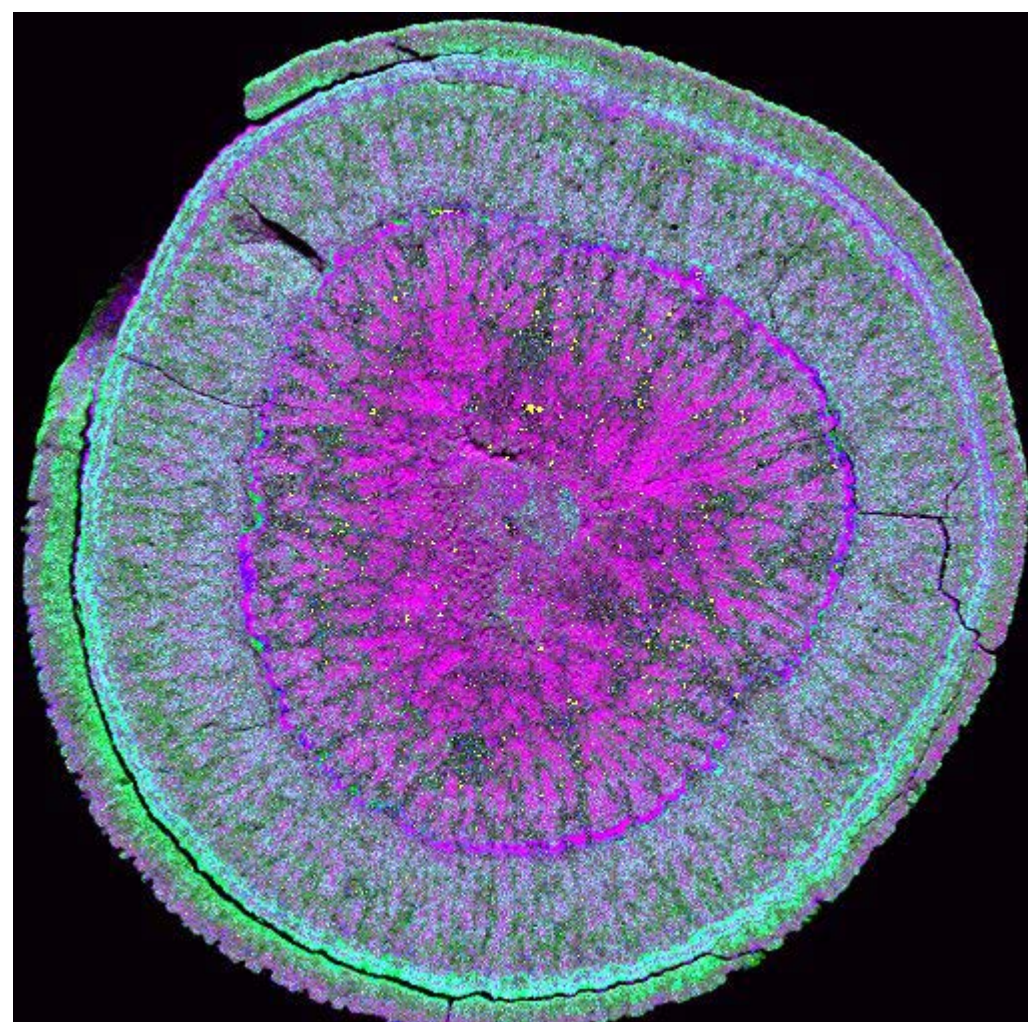

YK16-01 6K#1463N2-019

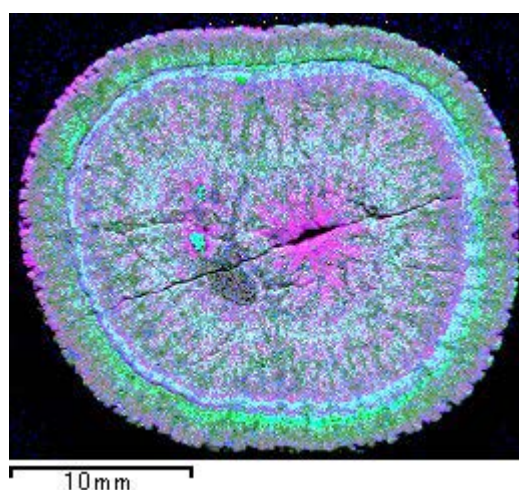

YK16-01 6K#1463N2-023

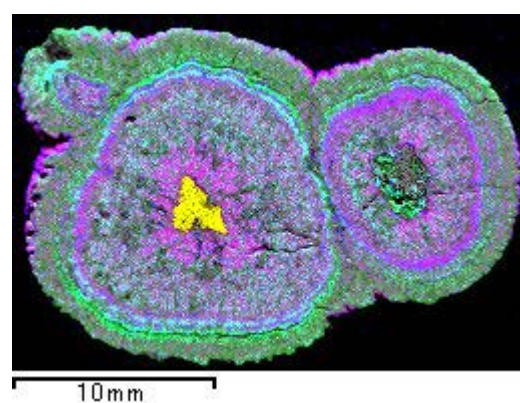

**Figure S3** Merged multichemical feature map of the samples analyzed in this study collected from site 6K#1463 in the Southeast EEZ region during the cruise YK16-01. The gray field indicates the nucleus(nuclei) of each sample.



Southeast EEZ

YK16-01 6K#1463N3-002

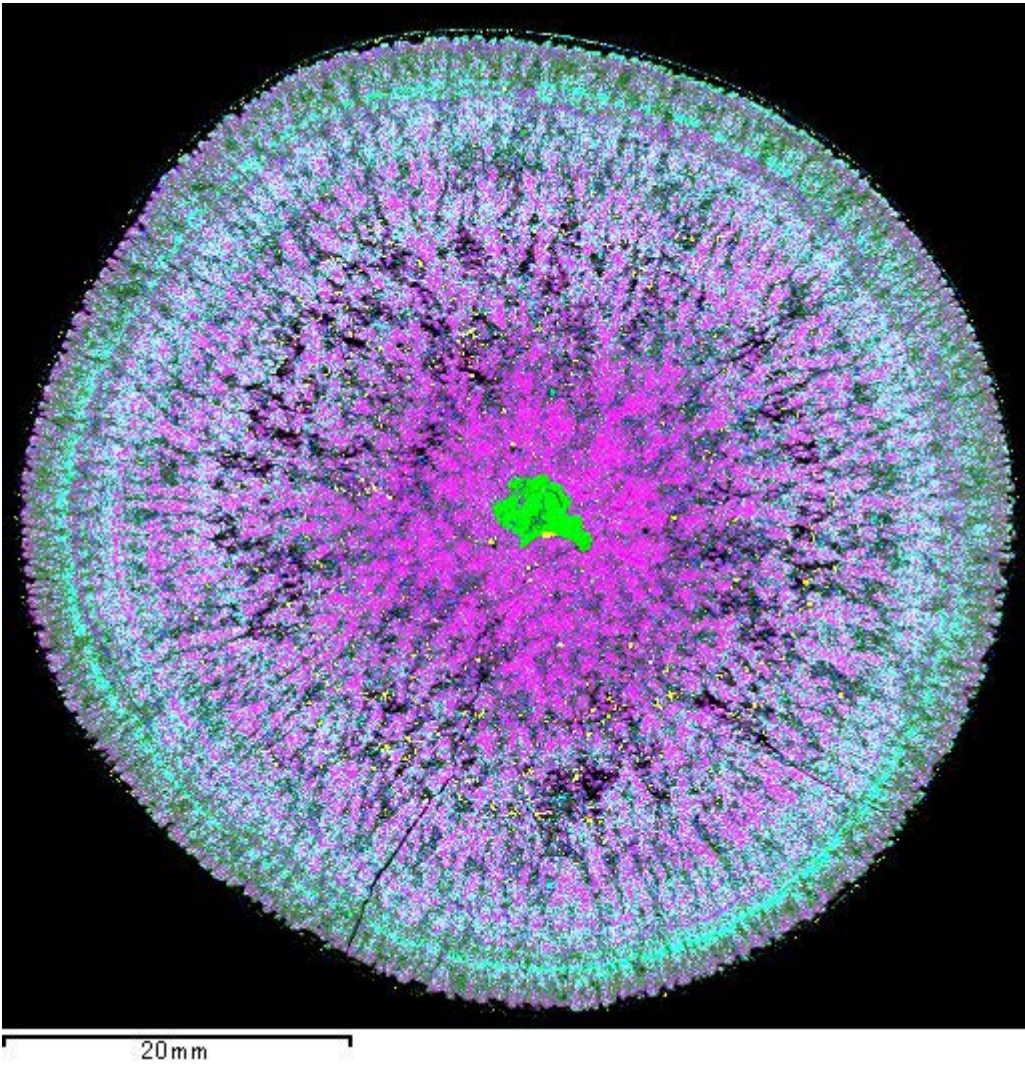

YK16-01 6K#1463N3-008

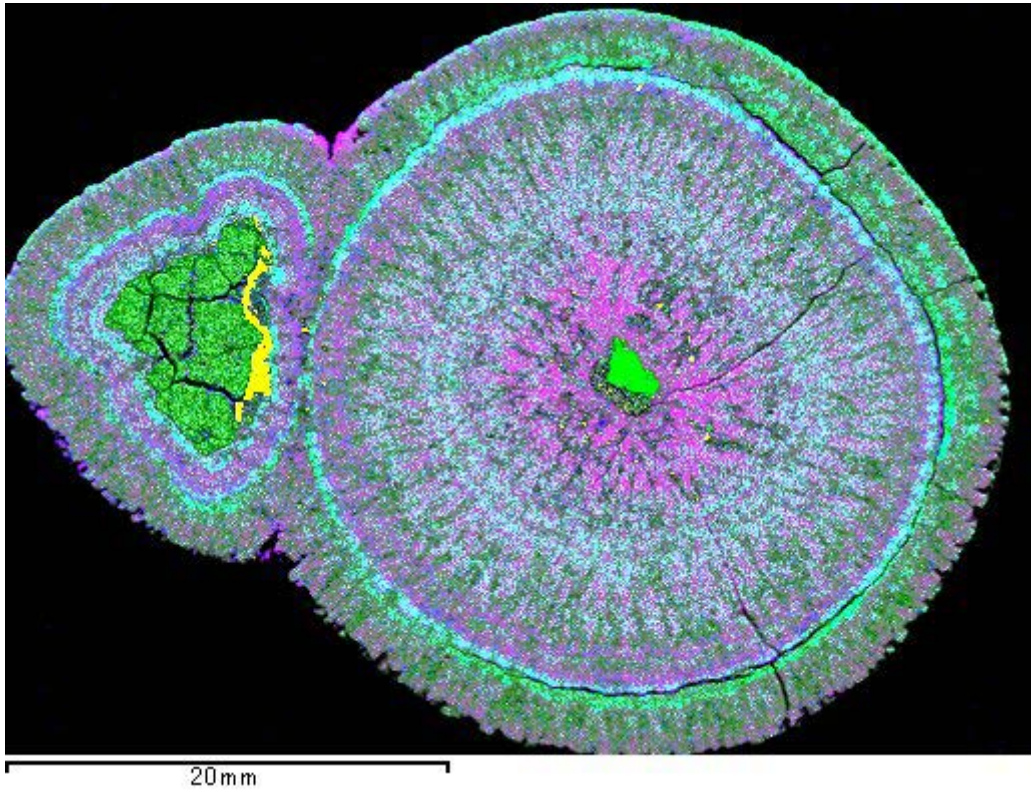

YK16-01 6K#1463N3-007

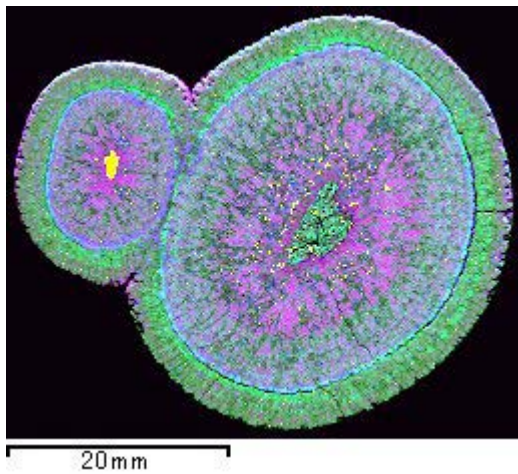

YK16-01 6K#1463N3-016

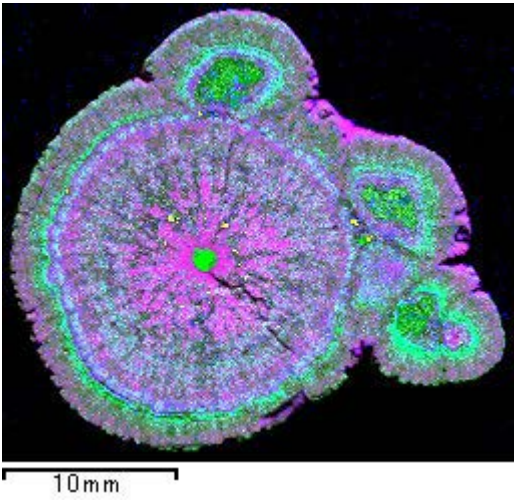

YK16-01 6K#1463N4-007

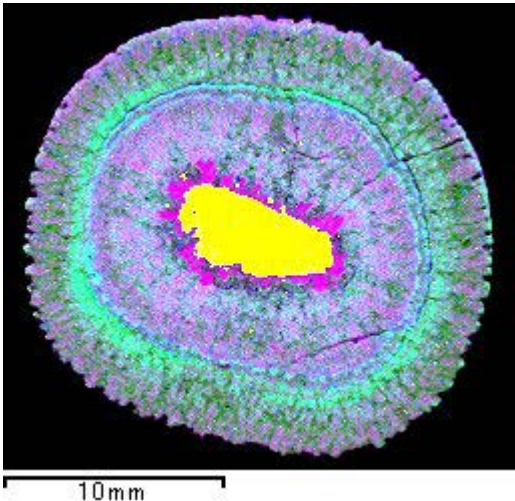

YK16-01 6K#1463N4-009

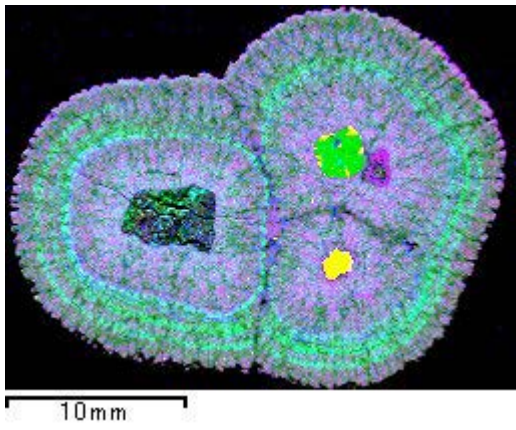

YK16-01 6K#1463N4-010

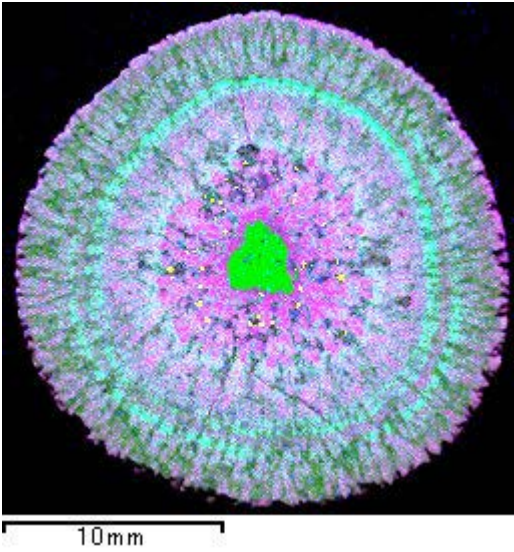

YK16-01 6K#1463N5-007

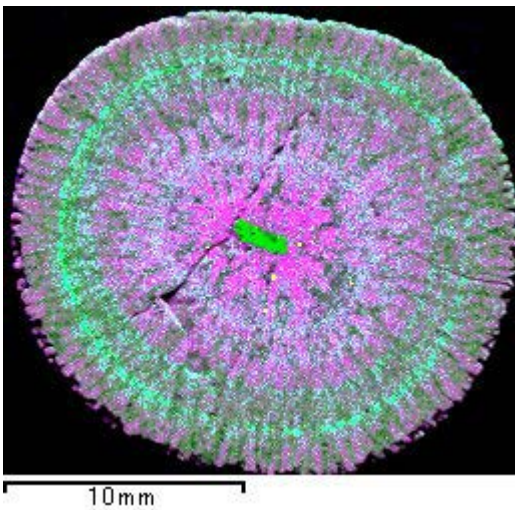

YK16-01 6K#1463N5-009

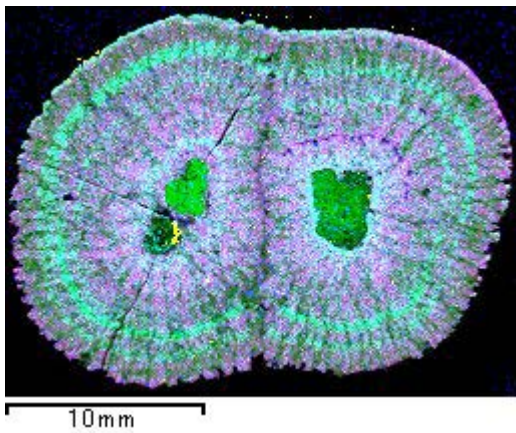

Figure S3 (Continued)



# Around Takuyo Daigo SMT

YK16-01 6K#1460N1-002

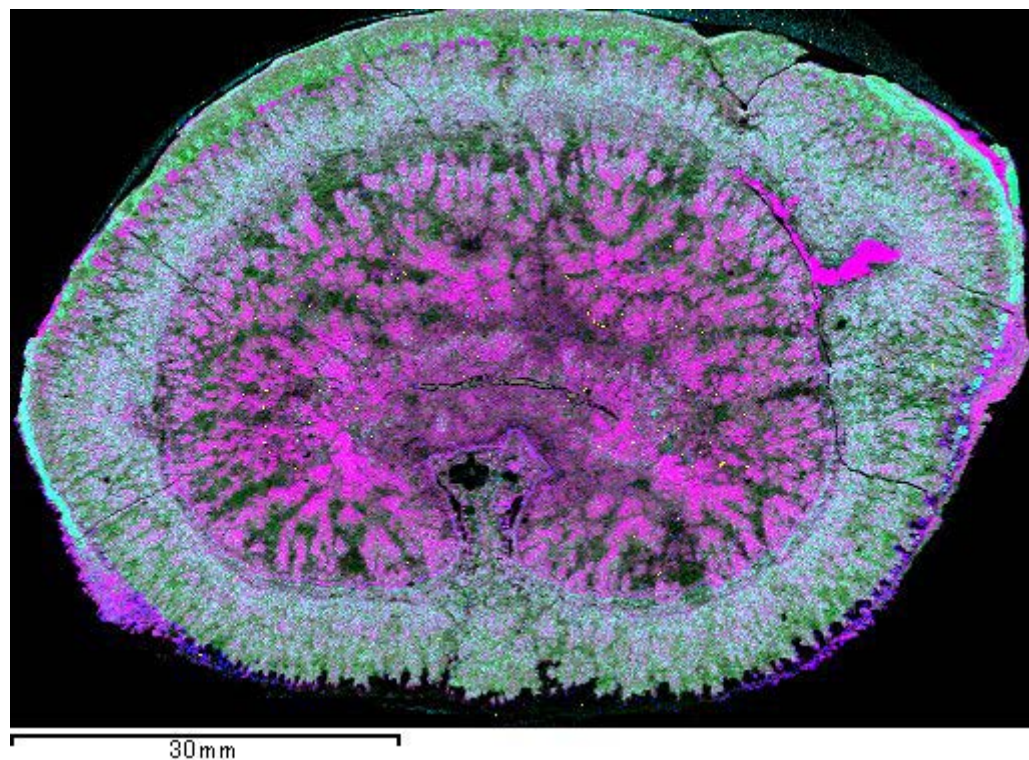

YK16-01 6K#1460N2-004

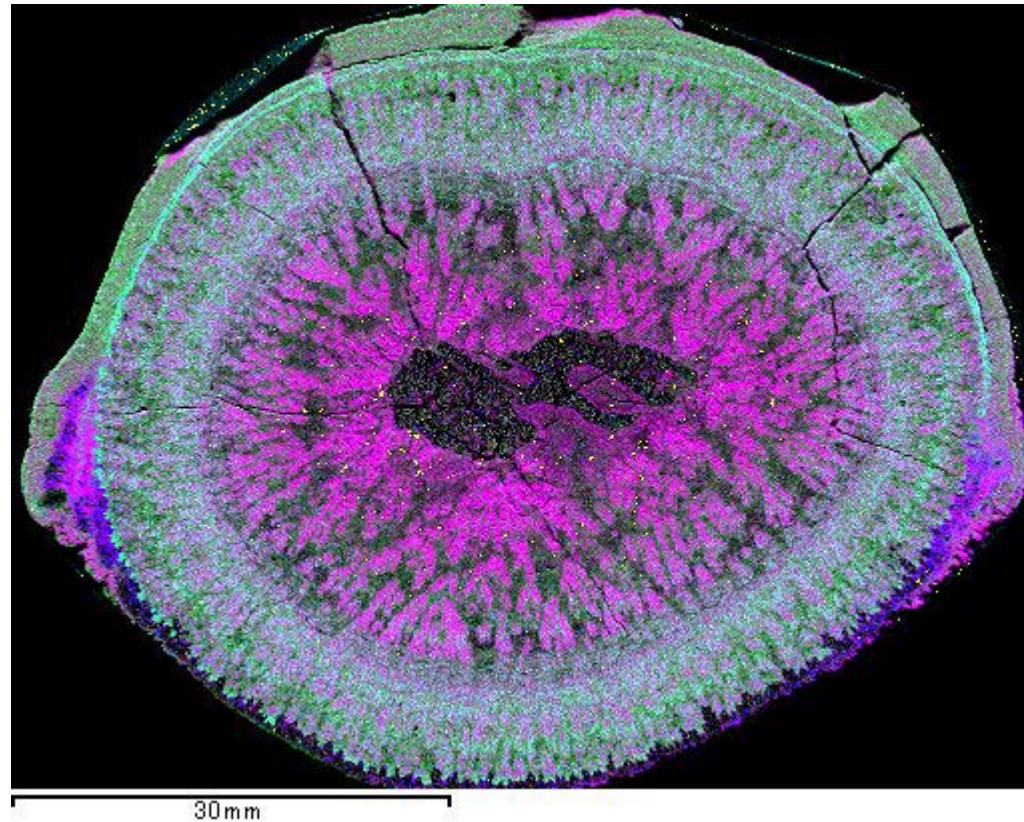

YK16-01 6K#1461N1-002

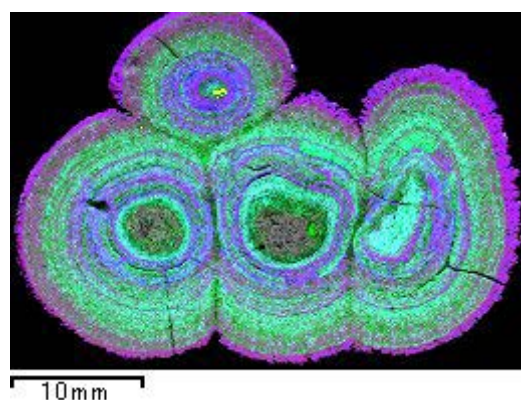

YK16-01 6K#1461N1-006

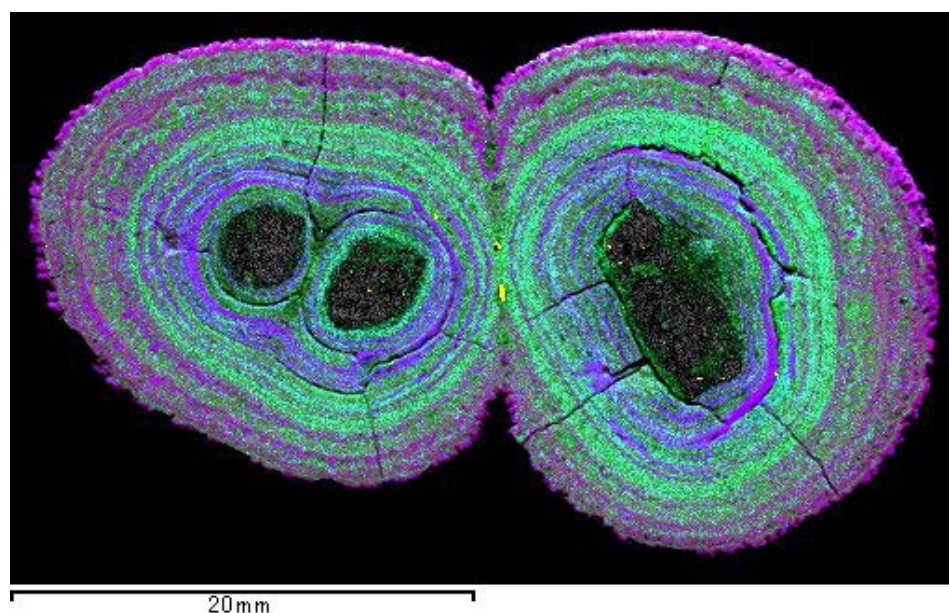

YK16-01 6K#1461N1-005

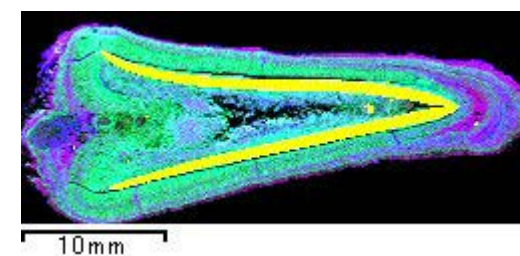

YK16-01 6K#1461N2-013

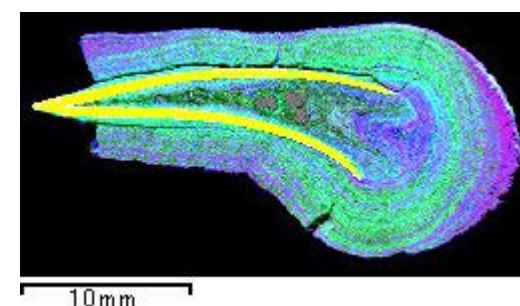

YK16-01 6K#1465N4-009

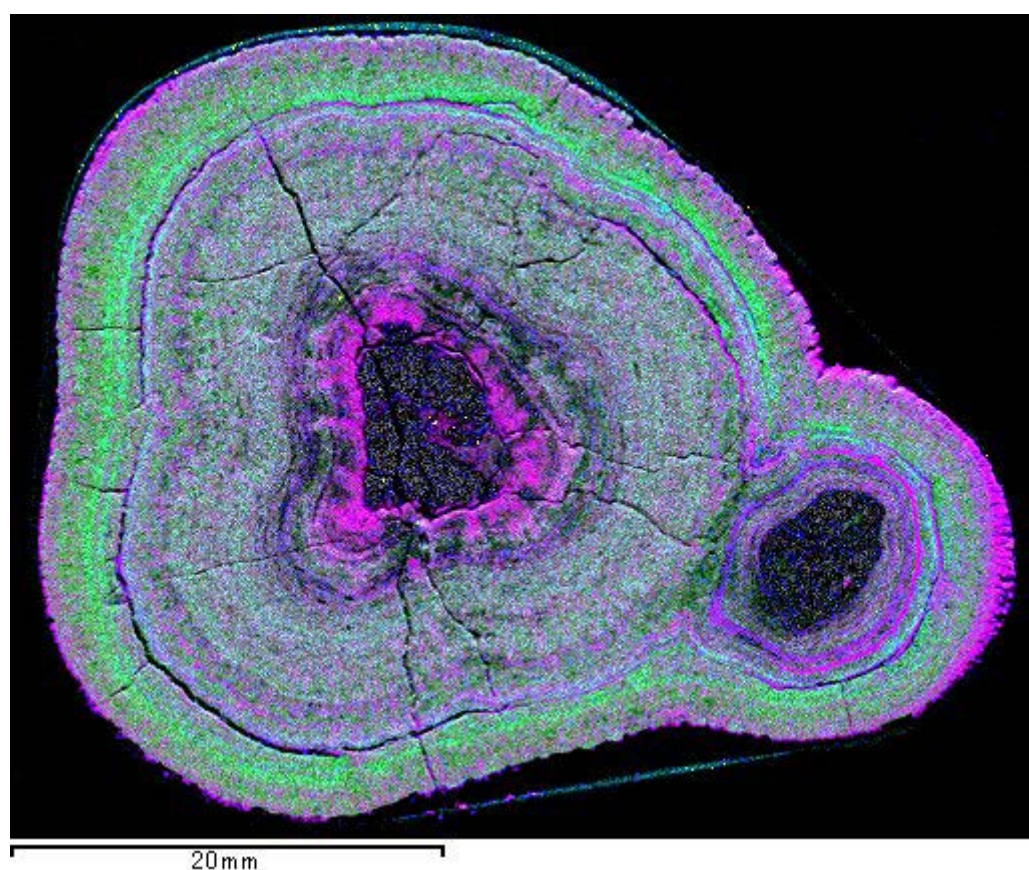

YK16-01 6K#1465N4-001B

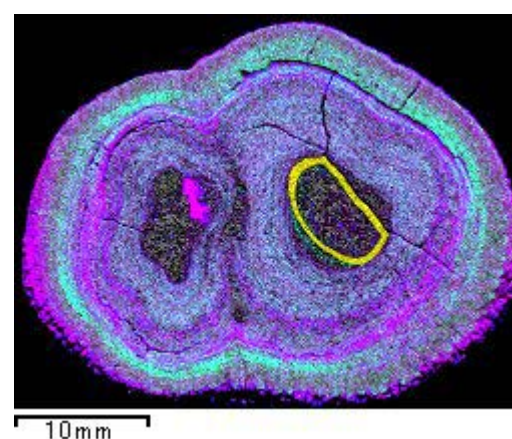

YK16-01 6K#1465N4-011

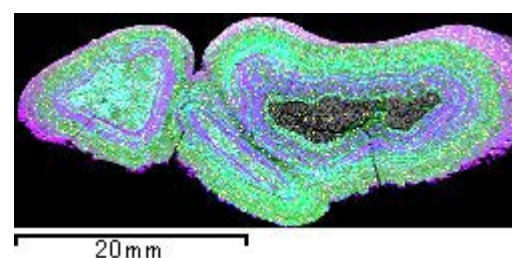

**Figure S4** Merged multichemical feature map of the samples analyzed in this study collected from sites 6K#1460, 6K#1461, and 6K#1465 in the Around Takuyo Daigo Seamount region during the cruise YK16-01. The gray field indicates the nucleus(nuclei) of each sample.



## Around Takuyo Daigo SMT

YK16-01 6K#1464N1-002

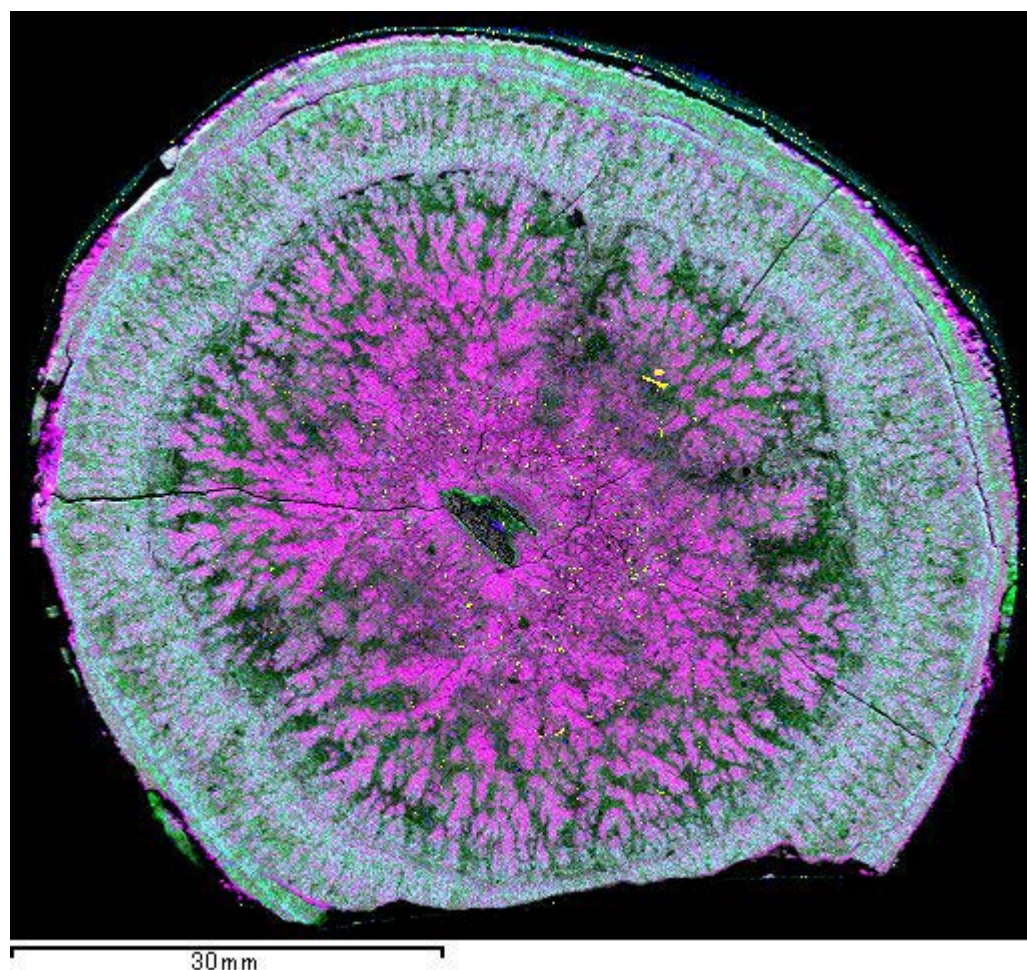

YK16-01 6K#1464N1-006

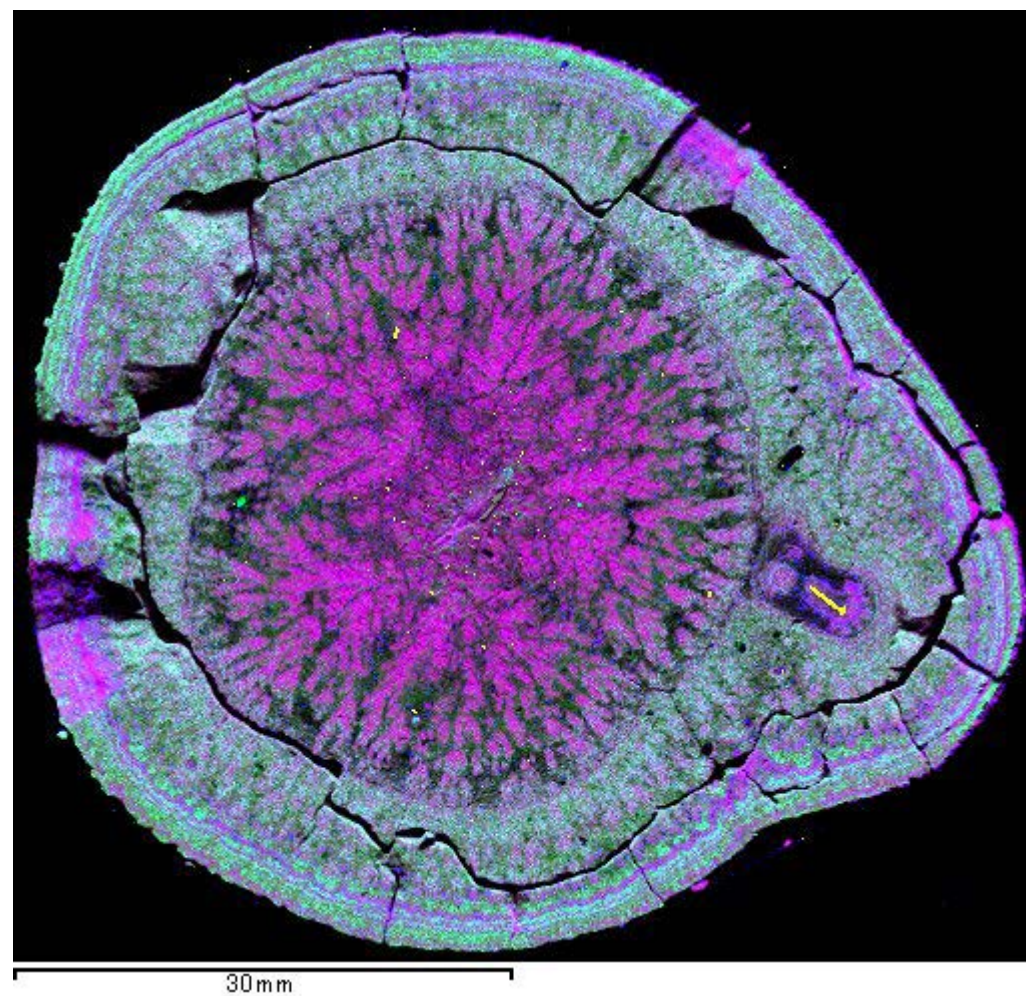

YK16-01 6K#1464N2-001

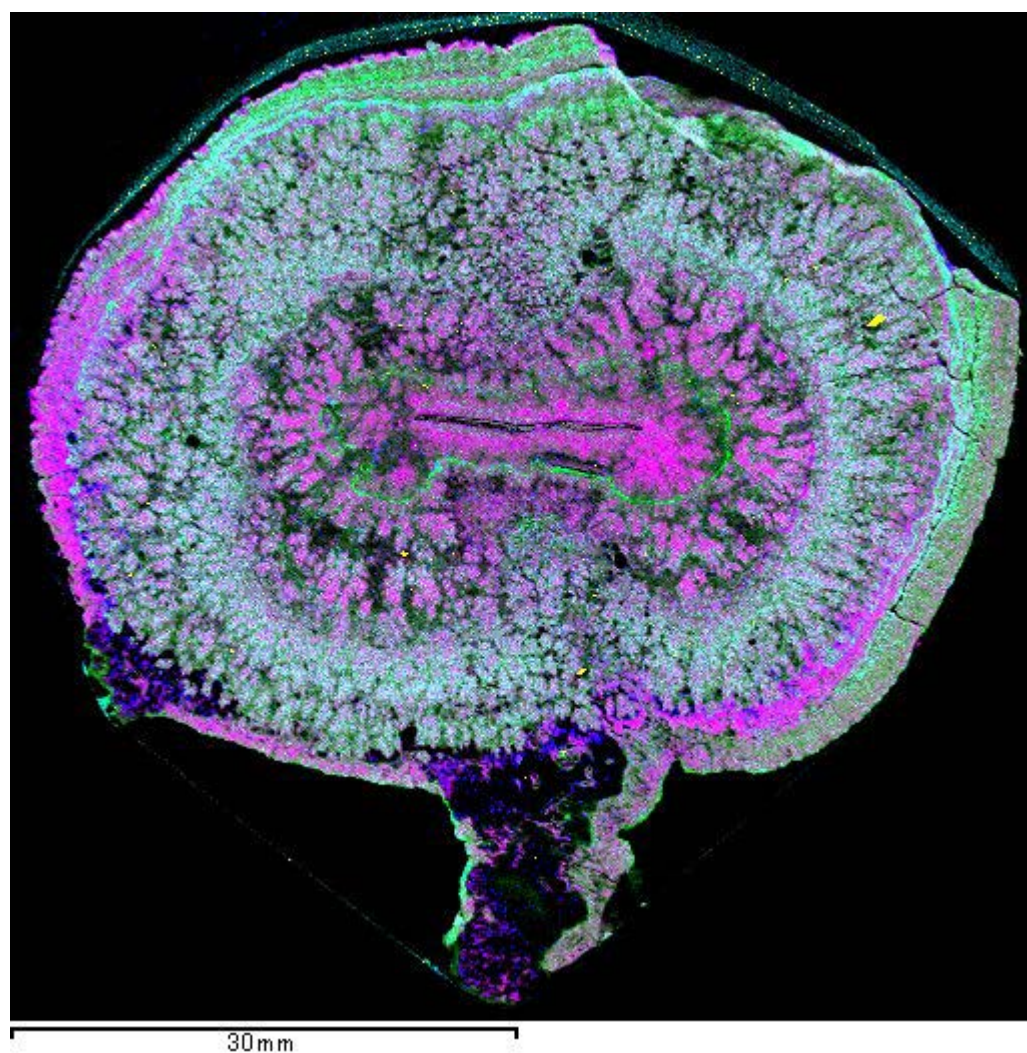

YK16-01 6K#1464N3-001D

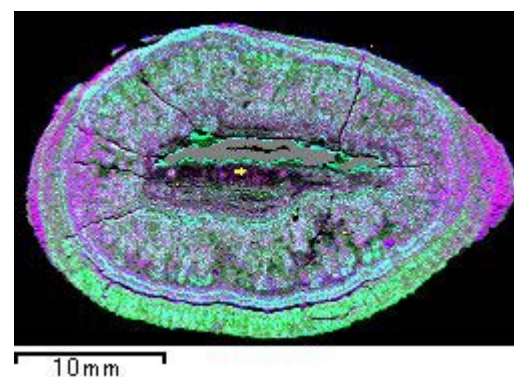

YK16-01 6K#1464N3-008

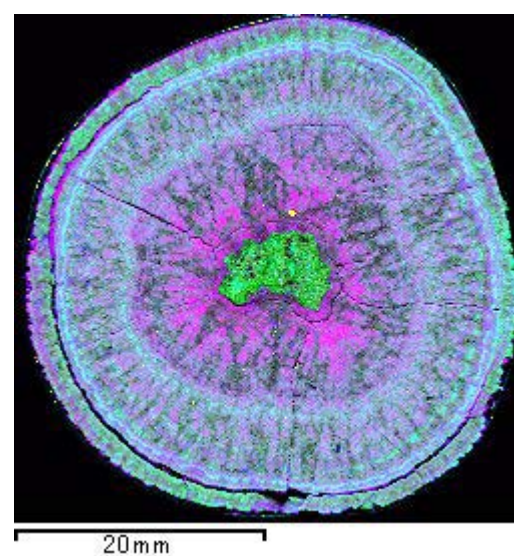

**Figure S5** Merged multichemical feature map of the samples analyzed in this study collected from site 6K#1464 in the Around Takyo Daigo Seamount region during the cruise YK16-01. The gray field indicates the nucleus(nuclei) of each sample.



**Around Takuyo Daigo SMT**

**YK16-01 6K#1464N4-001**

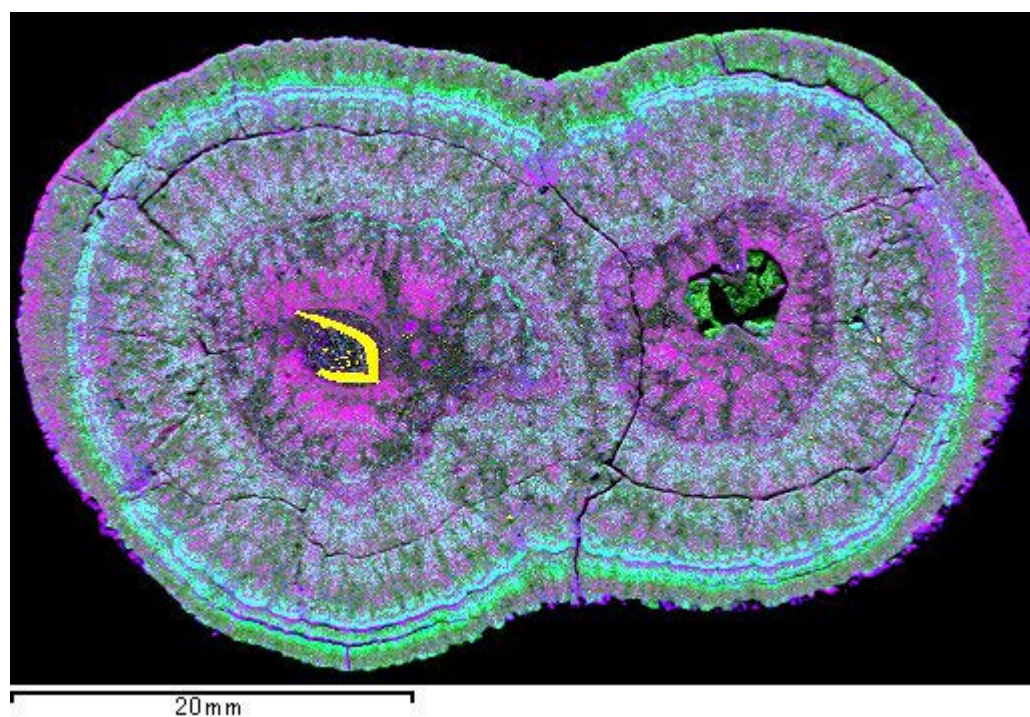

**YK16-01 6K#1464N4-010**

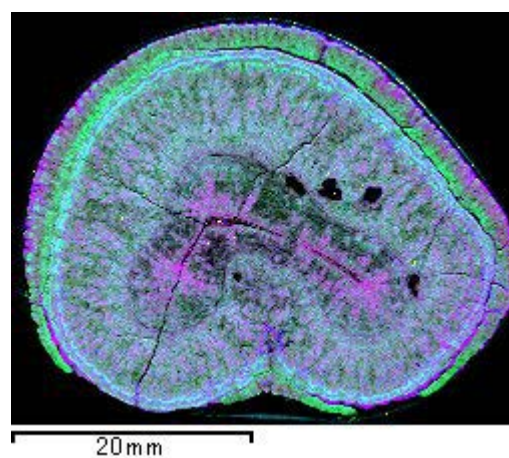

**YK16-01 6K#1464N5-004**

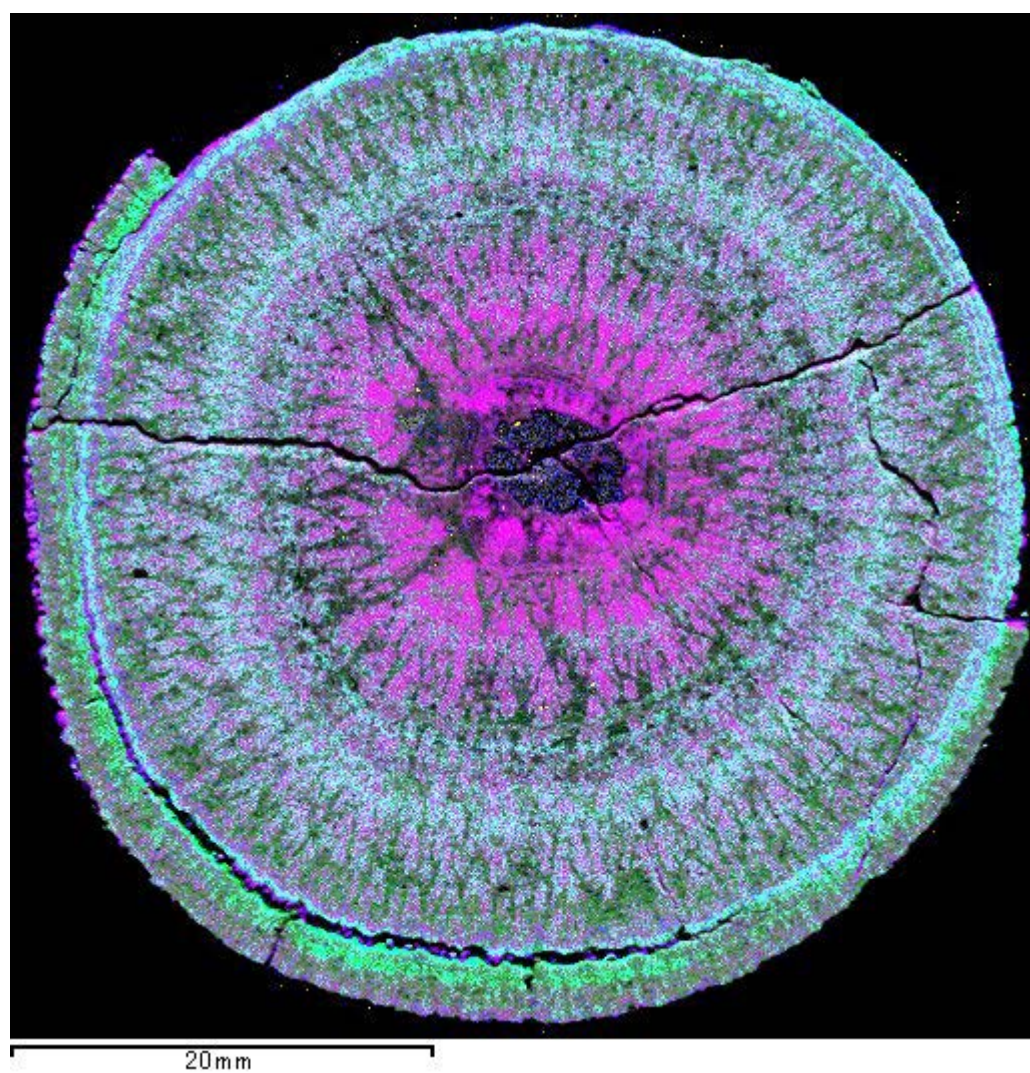

**YK16-01 6K#1464N5-011**

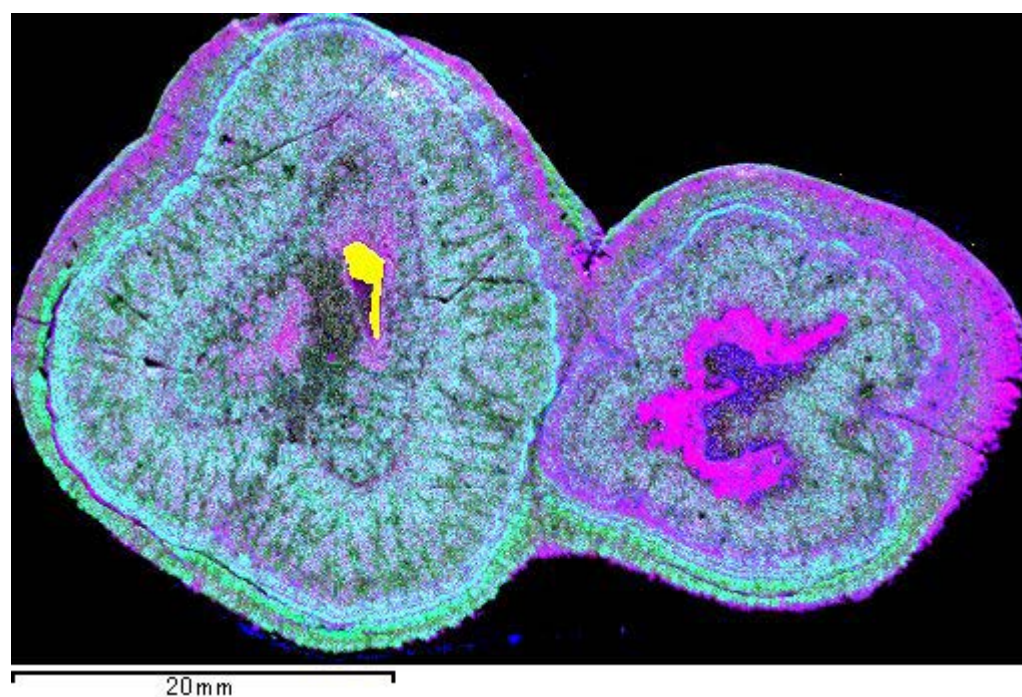

**YK16-01 6K#1464N6-006**

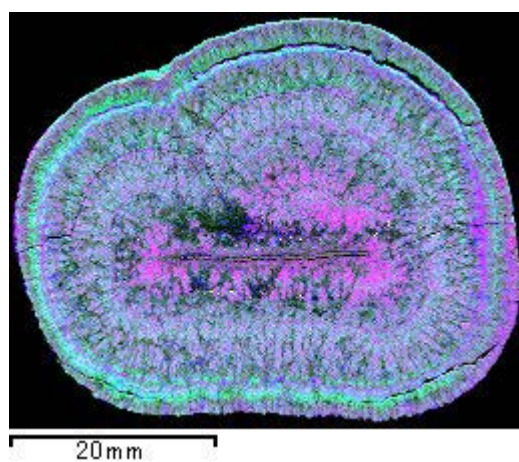

**YK16-01 6K#1464N6-007**

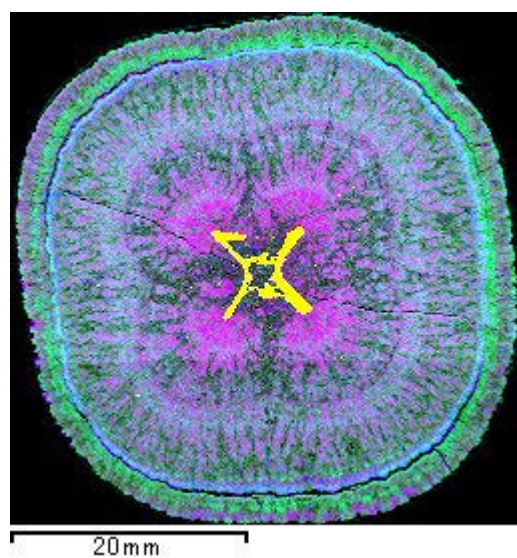

**YK16-01 6K#1464N6-013**

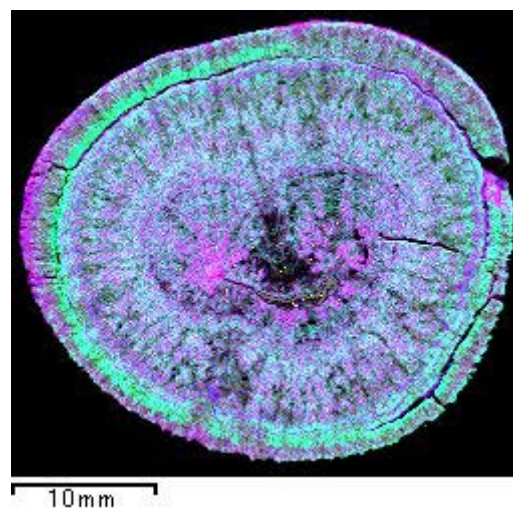

**Figure S5 (Continued)**
